# Supplementary material for: Investigating energy transfer in lanthanide-doped double perovskites exhibiting visible and near-infrared emission
Source: Royal Society of Chemistry journal article supplement (doi:10.1039/d4tc03099k), 2024-01-01
Supplement: d4tc03099k1.pdf [file d4tc03099k1.pdf]

## Supporting Information

### Investigating Energy Transfer in Lanthanide-Doped Double Perovskites Exhibiting Visible and Near-Infrared Emission

Jueran Cao <sup>a</sup>, Baoling Tang <sup>a</sup>, Tianrui Li <sup>a</sup>, Mingkai Wei <sup>a</sup>, , Xuejie Zhang <sup>a</sup>, Mingtao Zheng <sup>a</sup>,  
<sup>b</sup>, Bin Dong <sup>c</sup>, Xinming Li <sup>c</sup>, Yan Cong <sup>c</sup>, \*Maxim S. Molochev <sup>c</sup>, and Bingfu Lei<sup>a, b, \*</sup>

<sup>a</sup> Key Laboratory for Biobased Materials and Energy of Ministry of Education, College of Materials and Energy, South China Agricultural University Guangzhou 510642, Guangdong, P. R. China

<sup>b</sup> Maoming Branch, Guangdong Laboratory for Lingnan Modern Agriculture, Guangdong Maoming 525100, P. R. China

<sup>c</sup> College of Physics and Materials Engineering, Dalian Minzu University, Dalian 11660, P. R. China

<sup>d</sup> Department of Physics and Technical Sciences, Western Caspian University, Baku, AZ 1001, Azerbaijan

Corresponding authors E-mail: tleibf@scau.edu.cn

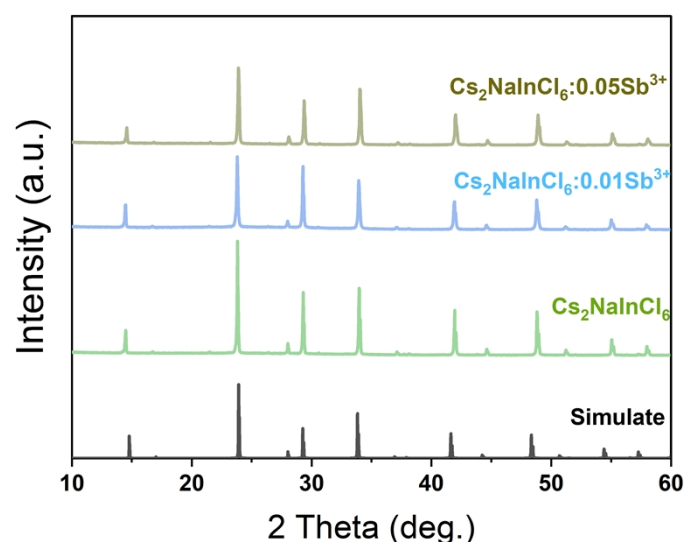

Fig. S1 XRD patterns of the  $\text{Cs}_2\text{NaInCl}_6:x\text{Sb}^{3+}$  ( $x = 0, 0.01, 0.05$ ).

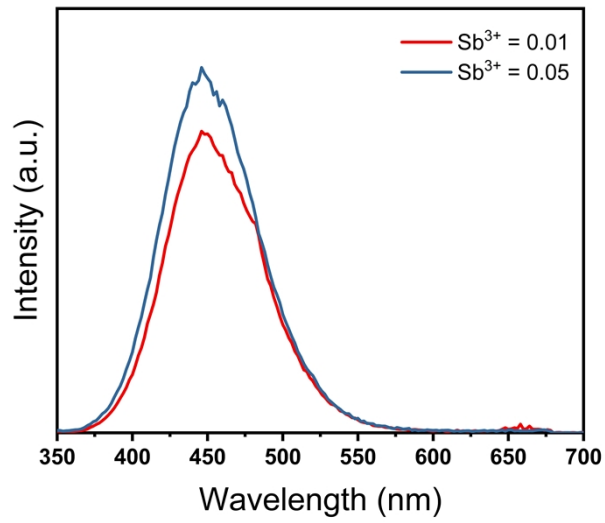

**Fig. S2** Visible emission spectra ( $\lambda_{\text{ex}}=350$  nm) of  $\text{Cs}_2\text{NaInCl}_6: \text{Sb}^{3+}-0.1\text{Tm}^{3+}$  DPs at different  $\text{Sb}^{3+}$  concentrations.

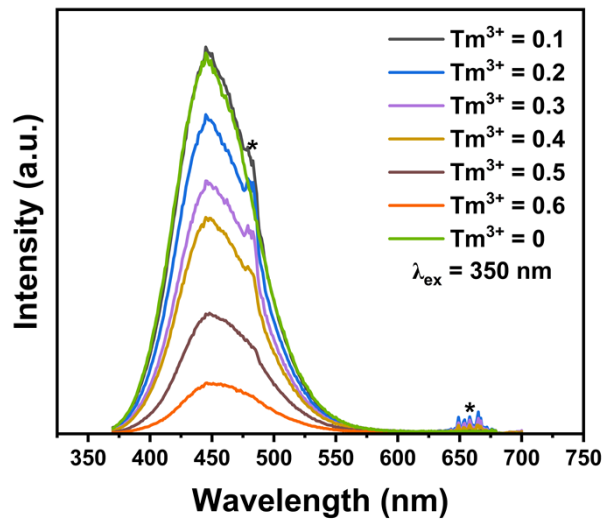

**Fig. S3** Visible emission spectra ( $\lambda_{\text{ex}}=350$  nm) of  $\text{Cs}_2\text{NaInCl}_6:5\%\text{Sb}^{3+}-\text{Tm}^{3+}$  DPs at different  $\text{Tm}^{3+}$  concentrations.

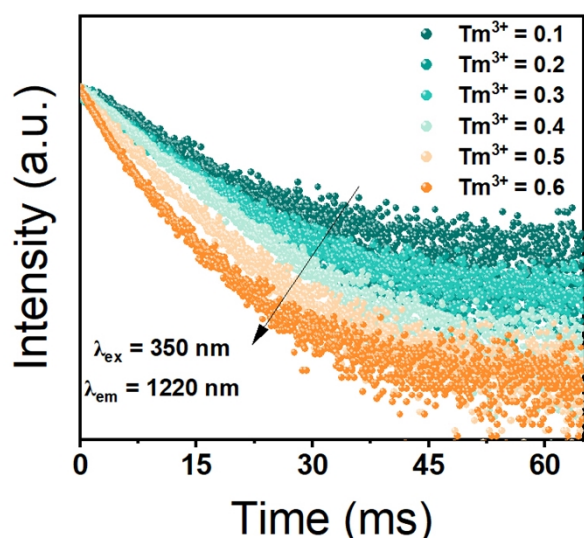

**Fig. S4** Concentration dependent photoluminescence decay curve of  $\text{Cs}_2\text{NaInCl}_6: \text{Sb}^{3+}, \text{Tm}^{3+}$  DPs monitored at 1220 nm.

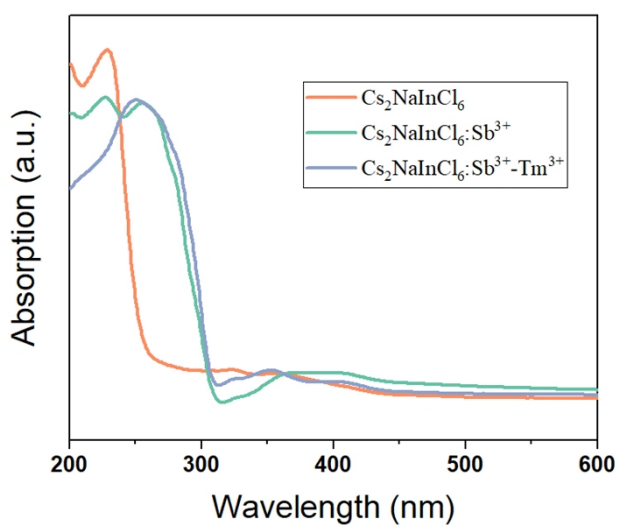

**Fig. S5** Absorption spectra of undoped,  $\text{Sb}^{3+}$ -doped, and  $\text{Sb}^{3+}-\text{Tm}^{3+}$  co-doped  $\text{Cs}_2\text{NaInCl}_6$ .

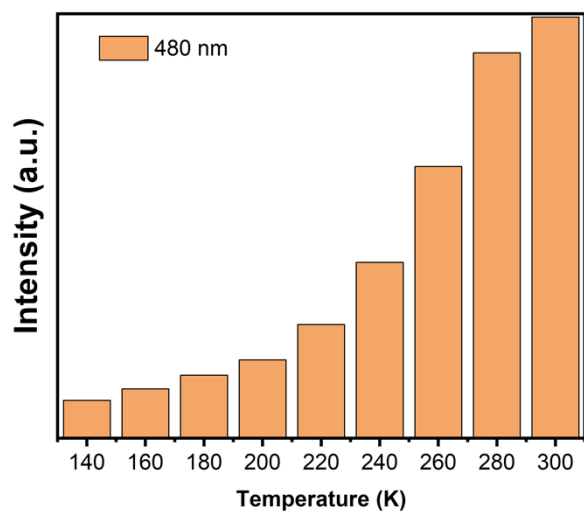

**Fig. S6** Integrated PL intensity at 480 nm as a function of temperature for Sb<sup>3+</sup>-Tm<sup>3+</sup> codoped Cs<sub>2</sub>NaInCl<sub>6</sub>
